# Supplementary material
Source: PubMed Central journal article supplement (PMC8824303)
Supplement: mmc1.pdf [file mmc1.pdf]

# THE LANCET Psychiatry

## Supplementary appendix

This appendix formed part of the original submission and has been peer reviewed. We post it as supplied by the authors.

Supplement to: Newlove-Delgado T, McManus S, Sadler K, et al. Child mental health in England before and during the COVID-19 lockdown. *Lancet Psychiatry* 2021; published online Jan 11. [http://dx.doi.org/10.1016/S2215-0366\(20\)30570-8](http://dx.doi.org/10.1016/S2215-0366(20)30570-8).

The Mental Health of Children and Young People group collaboration includes: Cher Cartwright (NHS Digital), Jodie Davis (Office for National Statistics), Tamsin Ford (Cambridge University), Charlotte Leach (Office for National Statistics), Dhriti Mandalia (National Centre for Social Research), Franziska Marcheselli (National Centre for Social Research), Sally McManus (National Centre for Social Research), Tamsin Newlove-Delgado (University of Exeter), Katharine Sadler (National Centre for Social Research), Sharon Thandi (NHS Digital), Tim Vizard (Office for National Statistics), and Tracy Williams (Office for National Statistics).
